# Supplementary material
Source: publisher site journal article supplement (https://www.dovepress.com/article/347026)
Supplement: Supplementary file 1 [file get_supplementary_file.php]

**SUPPLEMENTARY MATERIALS**

**Elevated Albumin to Globulin Ratio on Day 7 is Associated with Improved Function Outcomes in Acute Ischemic Stroke Patients with Intravenous Thrombolysis**

**Table S1.** Paired *t*-tests comparing admission and 24h albumin, globulin and A/G ratio in 249 patients received both admission and 24h blood tests, and comparing 24h and 7-day albumin, globulin and A/G ratio in 124 patients received both 24h and 7-day blood tests.

| Characteristics | Blood test (albumin, globulin or A/G ratio) | | |
| --- | --- | --- | --- |
| Earlier | Later | *p* value |
| Admission Alb vs. 24h-Alb  (No. of available admission & 24h Alb) |  |  |  |
| Total (n = 249) | 40.09 ± 3.10 | 37.98 ± 3.20 | < 0.001 |
| Patients with mRS 0-2 (n = 172) | 41.29 ± 2.91 | 38.07 ± 2.97 | < 0.001 |
| Patients with mRS 3-6 (n = 77) | 39.89 ± 3.30 | 37.79 ± 3.65 | < 0.001 |
| Admission Glb vs. 24h-Glb  (No. of available admission & 24h A/G) |  |  |  |
| Total (n = 249) | 33.49 ± 4.64 | 27.59 ± 4.54 | < 0.001 |
| Patients with mRS 0-2 (n = 172) | 33.09 ± 4.61 | 26.88 ± 4.12 | < 0.001 |
| Patients with mRS 3-6 (n = 77) | 34.40 ± 4.61 | 29.19 ± 5.04 | < 0.001 |
| Admission A/G vs. 24h-A/G  (No. of available admission & 24h A/G) |  |  |  |
| Total (n = 249) | 1.24 ± 0.19 | 1.42 ± 0.26 | < 0.001 |
| Patients with mRS 0-2 (n = 172) | 1.27 ± 0.18 | 1.46 ± 0.25 | < 0.001 |
| Patients with mRS 3-6 (n = 77) | 1.18 ± 0.20 | 1.33 ± 0.28 | < 0.001 |
| 24h-Alb vs. 7 day-Alb  (No. of available 24h & 7-day Alb)) |  |  |  |
| Total (n = 124) | 37.66 ± 3.19 | 36.70 ± 3.31 | 0.001 |
| Patients with mRS 0-2 (n = 85) | 37.61 ± 3.02 | 37.50 ± 3.15 | 0.695 |
| Patients with mRS 3-6 (n = 39) | 37.78 ± 3.57 | 34.95 ± 3.01 | < 0.001 |
| 24h-Glb vs. 7 day-Glb  (No. of available 24h & 7-day Glb) |  |  |  |
| Total (n = 124) | 28.38 ± 4.50 | 28.69 ± 5.02 | 0.315 |
| Patients with mRS 0-2 (n = 85) | 27.14 ± 4.19 | 27.42 ± 4.63 | 0.361 |
| Patients with mRS 3-6 (n = 39) | 31.07 ± 3.98 | 31.48 ± 4.75 | 0.597 |
| 24h-A/G vs. 7 day-A/G  (No. of available 24h & 7-day A/G) |  |  |  |
| Total (n = 124) | 1.36 ± 0.24 | 1.32 ± 0.27 | 0.001 |
| Patients with mRS 0-2 (n = 85) | 1.42 ± 0.24 | 1.42 ± 0.25 | 0.318 |
| Patients with mRS 3-6 (n = 39) | 1.23 ± 0.15 | 1.13 ± 0.18 | < 0.001 |

| **Table S2**. Reclassification and discrimination statistics for 3-month death or major disability by 7-day albumin to globulin ratio (A/G) in AIS patients with intravenous thrombolysis. | | | | | | | | |
| --- | --- | --- | --- | --- | --- | --- | --- | --- |
|  | C-statistics | |  | Continuous NRI | |  | IDI | |
| Estimate  (95% CI) | *p* value | Estimate  (95% CI) | *p* value |  | Estimate  (95% CI) | *p* value |
| Conventional model | 0.844 (0.768-0.903) |  |  | Ref. |  |  | Ref. |  |
| Conventional model + A/G (continuous) | 0.913 (0.849-0.956) | 0.013 |  | 1.072 (0.758-1.387) | < 0.001 |  | 0.153 (0.087-0.220) | < 0.001 |
| Conventional model + A/G (categorical) | 0.906 (0.840-0.951) | 0.030 |  | 1.049 (0.733-1.365) | < 0.001 |  | 0.178 (0.108-0.248) | < 0.001 |
| The conventional model included age, sex, current smoking, hyperlipidemia, atrial fibrillation, prior stroke, systolic blood pressure, fasting glucose and NIHSS at admission. | | | | | | | | |

**Table S3.** Characteristics of ischemic stroke patients without intravenous thrombolysis.

| Characteristics | Available  cases | Function outcomes | | |
| --- | --- | --- | --- | --- |
| mRS 0-2 (n = 99) | mRS 3-6 (n = 43) | *p* value |
| Demographic data |  |  |  |  |
| Age, (years) | 142 (100) | 67.26 ± 12.26 | 76.58 ± 11.44 | < 0.001 |
| Sex, (male, n.%) | 142 (100) | 66 (66.67) | 19 (44.19) | 0.013 |
| Stroke risk factors |  |  |  |  |
| Current smoking, n (%) | 142 (100) | 27 (27.27) | 6 (13.95) | 0.090 |
| Hypertension, n (%) | 142 (100) | 64 (64.65) | 33 (76.74) | 0.158 |
| Diabetes, n (%) | 142 (100) | 25 (25.25) | 15 (34.89) | 0.243 |
| Hyperlipidemia, n (%) | 142 (100) | 25 (25.25) | 12 (27.91) | 0.741 |
| Atrial fibrillation, n (%) | 142 (100) | 2 (2.02) | 1 (2.32) | 1.000 |
| Prior stroke, n (%) | 142 (100) | 13 (13.13) | 10 (23.26) | 0.137 |
| Laboratory data |  |  |  |  |
| TC, (mmol/L) | 136 (95.77) | 4.54 ± 1.00 | 4.78 ± 1.24 | 0.240 |
| TG, (mmol/L) | 136 (95.77) | 1.70 ± 1.09 | 1.47 ± 1.00 | 0.250 |
| HDL, (mmol/L) | 136 (95.77) | 0.99 ± 0.22 | 0.99 ± 0.18 | 0.953 |
| LDL, (mmol/L) | 136 (95.77) | 2.94 ± 0.90 | 3.23 ± 1.19 | 0.114 |
| FBG, (mmol/L) | 141 (99.29) | 6.43 ± 2.74 | 7.02 ± 3.43 | 0.285 |
| Admission-Alb (g/L) | 111 (78.17) | 42.26 ± 2.75 | 40.95 ± 3.59 | 0.049 |
| Admission-Glb (g/L) | 111 (78.17) | 32.67 ± 4.74 | 34.75 ± 5.32 | 0.037 |
| Admission-A/G | 111 (78.17) | 1.32 ± 0.20 | 1.20 ± 0.18 | 0.002 |
| 24h-Alb (g/L) | 141 (99.29) | 38.00 ± 2.79 | 36.69 ± 3.65 | 0.625 |
| 24h-Glb (g/L) | 141 (99.29) | 26.54 ± 3.91 | 27.98 ± 3.81 | 0.045 |
| 24h-A/G | 141 (99.29) | 1.46 ± 0.23 | 1.37 ± 0.20 | 0.017 |
| 7day-Alb (g/L) | 103 (72.54) | 37.97 ± 3.72 | 35.71 ± 3.04 | 0.003 |
| 7day-Glb (g/L) | 103 (72.54) | 27.28 ± 4.11 | 27.86 ± 5.01 | 0.542 |
| 7day-A/G (g/L) | 103 (72.54) | 1.42 ± 0.24 | 1.32 ± 0.25 | 0.068 |
| Clinical data |  |  |  |  |
| SBP, (mmHg) | 140 (98.59) | 163.08 ± 24.81 | 164.68 ± 26.69 | 0.734 |
| DBP, (mmHg) | 140 (98.59) | 83.99 ± 13.17 | 83.56 ± 15.30 | 0.868 |
| NIHSS at admission | 310 (99.68) | 2 (1-4) | 5 (3-7) | < 0.001 |
| Stroke subtype, n (%) | 142 (100) |  |  | 0.315 |
| CE |  | 11 (11.11) | 5 (11.63) |  |
| LAA |  | 55 (55.56) | 29 (67.44) |  |
| SAO |  | 15 (15.15) | 2 (4.65) |  |
| SOE/SUE |  | 18 (18.18) | 7 (16.28) |  |

Abbreviations: TC total cholesterol, TG triglyceride, LDL low-density lipoprotein, HDL high-density lipoprotein,

FBG fasting blood glucose, Alb albumin, Glb globulin, A/G albumin to globulin ratio SBP systolic blood pressure,

DBP diastolic blood pressure, NIHSS National Institute of Health Stroke Scale, LAA largeartery atherosclerosis,

CE cardioembolism, SAO small-artery occlusion, SOE stroke of other determined etiology, SUE stroke of undetermined etiology.

**Table S4.** Association between albumin, globulin, albumin/globulin ratio in different time points and function outcomes after ischemic stroke in these patients without intravenous thrombolysis.

| Characteristics | Death or major disability (mRS 3-6) | | |
| --- | --- | --- | --- |
| Events | OR* (95% CI) | *p* value |
| Admission-Albumin |  |  |  |
| Q1, n = 27, [< 39.3] | 15 |  |  |
| Q2, n = 30, [39.3-42.0] | 11 | 0.702 (0.194-2.534) | 0.589 |
| Q3, n = 27, [42.1-43.5] | 7 | 0.541 (0.137-2.136) | 0.380 |
| Q4, n = 27, [> 43.5] | 7 | 0.609 (0.148-2.509) | 0.493 |
| Per 1-SD increase |  | 0.767 (0.460-1.277) | 0.307 |
| Admission-Globulin |  |  |  |
| Q1, n = 27, [< 30.0] | 7 |  |  |
| Q2, n = 29, [30.0-33.3] | 7 | 0.503 (0.120-2.115) | 0.349 |
| Q3, n = 28, [33.4-36.1] | 11 | 0.860 (0.202-3.655) | 0.838 |
| Q4, n = 27, [> 36.1] | 15 | 1.109 (0.250-4.929) | 0.892 |
| Per 1-SD increase |  | 0.955 (0.552-1.652) | 0.868 |
| Admission-A/G ratio |  |  |  |
| Q1, n = 27, [< 1.16] | 13 |  |  |
| Q2, n = 27, [1.16-1.27] | 13 | 2.732 (0.698-10.689) | 0.149 |
| Q3, n = 30, [1.28-1.41] | 11 | 1.469 (0.359-6.002) | 0.593 |
| Q4, n = 27, [> 1.41] | 3 | 0.639 (0.108-3.796) | 0.622 |
| Per 1-SD increase |  | 0.851 (0.466-1.554) | 0.599 |
| 24h-Albumin |  |  |  |
| Q1, n = 34, [< 35.5] | 15 |  |  |
| Q2, n = 38, [35.5-38.1] | 8 | 0.675 (0.202-2.259) | 0.524 |
| Q3, n = 35, [38.2-39.9] | 7 | 0.734 (0.201-2.680) | 0.640 |
| Q4, n = 34, [> 39.9] | 13 | 1.711 (0.501-5.844) | 0.391 |
| Per 1-SD increase |  | 1.243 (0.779-1.983) | 0.362 |
| 24h-Glbulin |  |  |  |
| Q1, n = 33, [< 23.8] | 8 |  |  |
| Q2, n = 39, [23.8-27.0] | 7 | 0.449 (0.114-1.760) | 0.250 |
| Q3, n = 37, [27.1-29.5] | 16 | 1.351 (0.402-4.533) | 0.627 |
| Q4, n = 32, [> 29.5] | 12 | 0.774 (0.208-2.888) | 0.703 |
| Per 1-SD increase |  | 1.079 (0.689-1.689) | 0.741 |
| 24h-A/G ratio |  |  |  |
| Q1, n = 34, [< 1.29] | 15 | 1 |  |
| Q2, n = 43, [1.29-1.42] | 14 | 1.142 (0.353-3.699) | 0.824 |
| Q3, n = 30, [1.43-1.59] | 8 | 1.065 (0.284-3.996) | 0.926 |
| Q4, n = 34, [> 1.59] | 6 | 1.057 (0.262-4.259) | 0.938 |
| Per 1-SD increase |  | 1.001 (0.622-1.613) | 0.995 |
| 7day-Albumin |  |  |  |
| Q1, n = 25, [< 34.7] | 12 | 1 |  |
| Q2, n = 26, [34.7-37.9] | 13 | 1.140 (0.328-3.965) | 0.837 |
| Q3, n = 27, [38.0-39.8] | 4 | 0.356 (0.074-1.728) | 0.200 |
| Q4, n = 25, [> 39.8] | 3 | 0.226 (0.039-1.318) | 0.098 |
| Per 1-SD increase |  | 0.743 (0.408-1.351) | 0.330 |
| 7day-Glbulin |  |  |  |
| Q1, n = 24, [< 24.2] | 9 | 1 |  |
| Q2, n = 29, [24.2-27.3] | 8 | 0.240 (0.054-1.059) | 0.060 |
| Q3, n = 26, [27.4-30.0] | 3 | 0.136 (0.026-0.709) | 0.018 |
| Q4, n = 24, [> 30.0] | 12 | 0.522 (0.124-2.201) | 0.376 |
| Per 1-SD increase |  | 0.808 (0.485-1.346) | 0.413 |
| 7day-A/G ratio |  |  |  |
| Q1, n = 24, [< 1.24] | 12 |  |  |
| Q2, n = 28, [1.24-1.38] | 9 | 1.068 (0.268-4.253) | 0.926 |
| Q3, n = 25, [1.39-1.53] | 5 | 0.595 (0.133-2.656) | 0.496 |
| Q4, n = 26, [> 1.53] | 6 | 1.517 (0.305-7.556) | 0.611 |
| Per 1-SD increase |  | 1.165 (0.654-2.077) | 0.603 |

*Adjusted for confounders with *p* < 0.1 in the univariate analysis (age, sex, current smoking and NIHSS at admission).

**Table S5.** Diagnostic values of the albumin, globulin and albumin/globulin ratio for death or major disability (mRS 3-6) in these patients without intravenous thrombolysis.

|  | AUC (95%CI) | *p* value | Cutoff value | Sensitivity (%) | Specificity (%) |
| --- | --- | --- | --- | --- | --- |
| Admission-Albumin | 0.620 (0.530-0.717) | 0.030 | 38.5 | 35.00 | 92.96 |
| Admission-Globulin | 0.638 (0.542-0.727) | 0.017 | 34.4 | 60.00 | 71.83 |
| Admission-A/G ratio | 0.674 (0.579-0.760) | < 0.001 | 1.38 | 90.00 | 40.85 |
| 24h-Albumin | 0.535 (0.449-0.619) | 0.555 |  |  |  |
| 24h-Globulin | 0.609 (0.523-0.690) | 0.035 | 26.9 | 67.44 | 57.14 |
| 24h-A/G ratio | 0.621 (0.535-0.701) | 0.017 | 1.31 | 44.19 | 74.19 |
| 7day-Albumin | 0.707 (0.609-0.793) | < 0.001 | 37.1 | 75.00 | 70.42 |
| 7day-Globulin | 0.523 (0.422-0.622) | 0.735 |  |  |  |
| 7day-A/G ratio | 0.619 (0.518-0.713) | 0.056 |  |  |  |
